# Supplementary material
Source: HighWire-hosted journal article supplement (https://tobaccocontrol.bmj.com/content/tc-2023-058033)
Supplement: inline-supplementary-material-2 [file inline-supplementary-material-2.pdf]

Supplemental Figure 2: Total Number of Unique UPCs (Barcodes) with Sales Dollars by Nicotine Strength, Disposables E-Cigarettes, NielsenIQ United States, January 2017 – September 2022\*

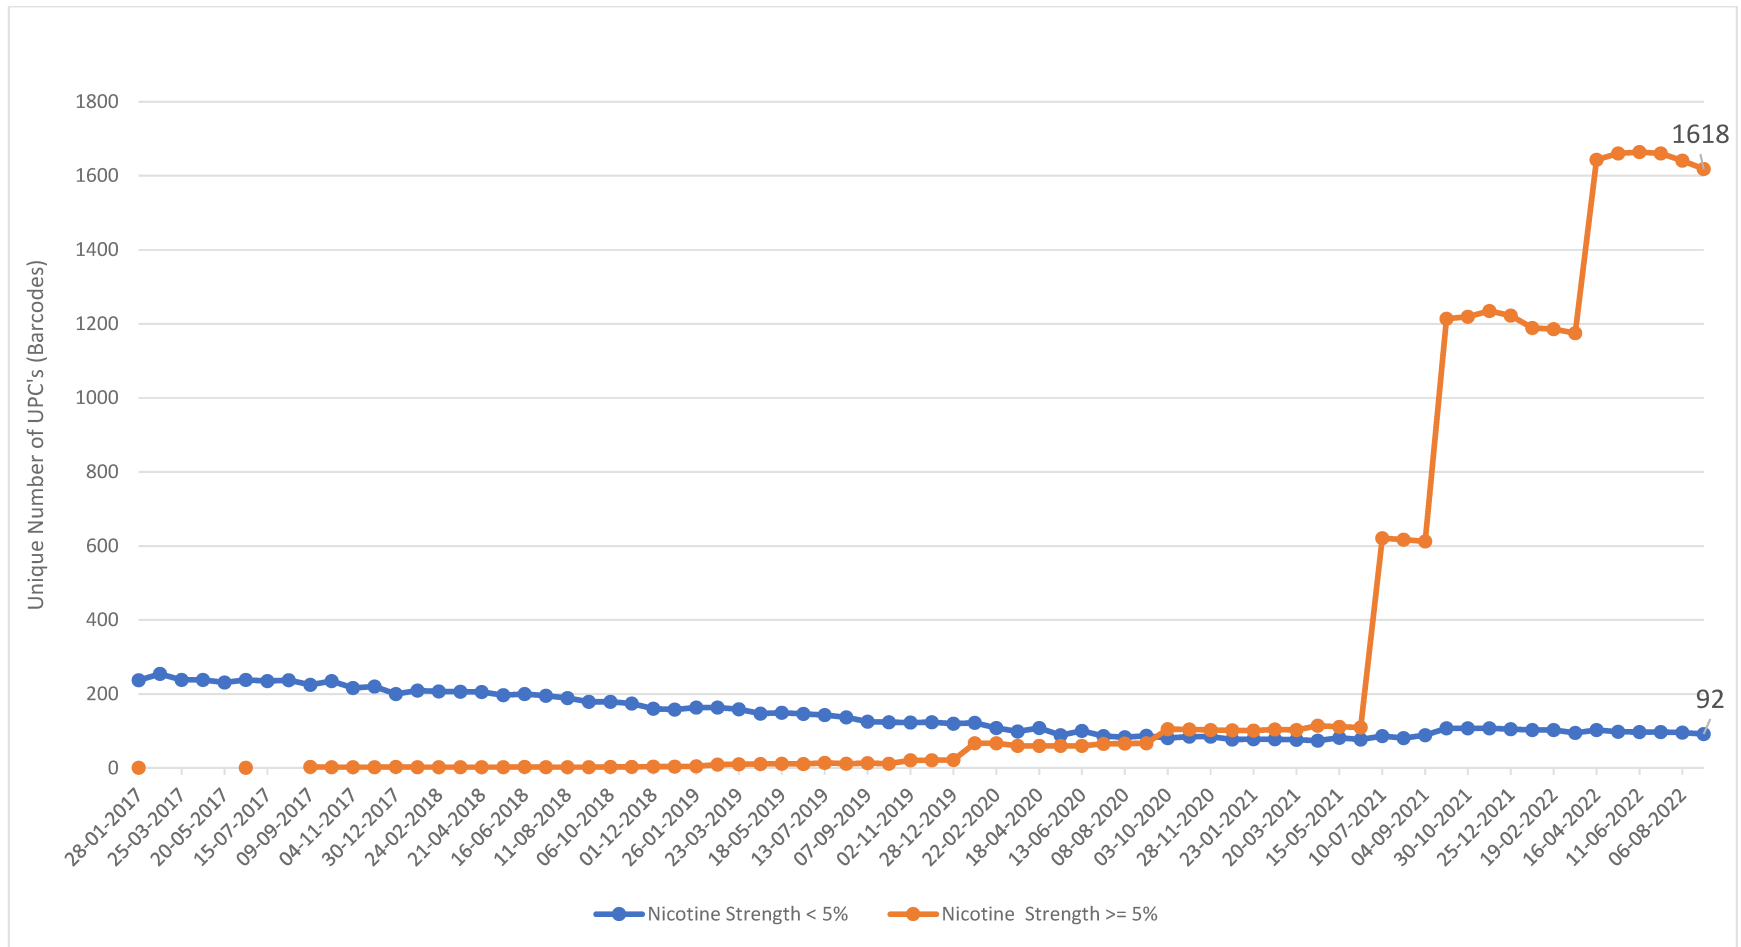

\*Each time period represents a 4-week interval
